# Supplementary material
Source: Springer Nature journal article supplement (https://www.springerprofessional.de/resource/supplementary/13638_2011_256_MOESM1_ESM.pdf/11898106)

### First hop transmission

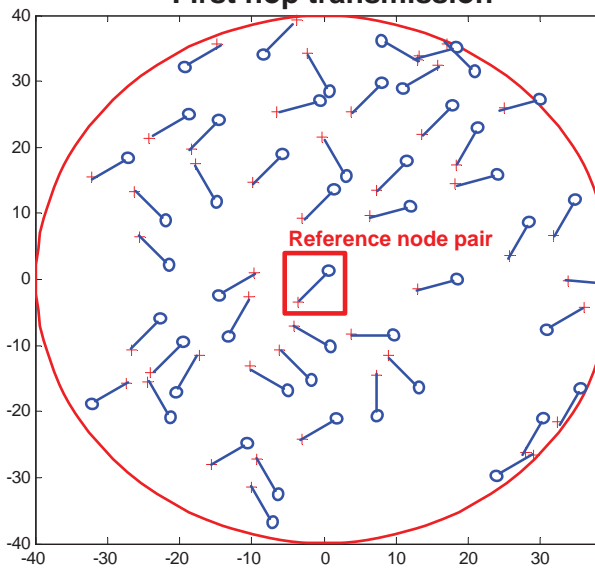

### Second hop transmission

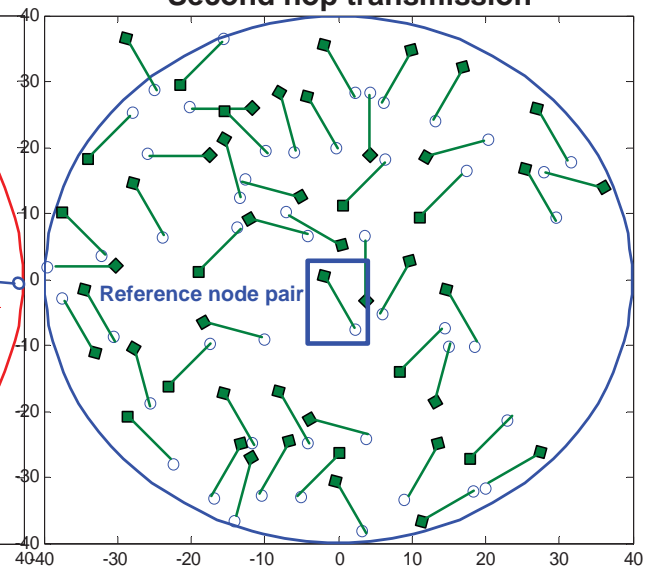

### Dual-hop relaying

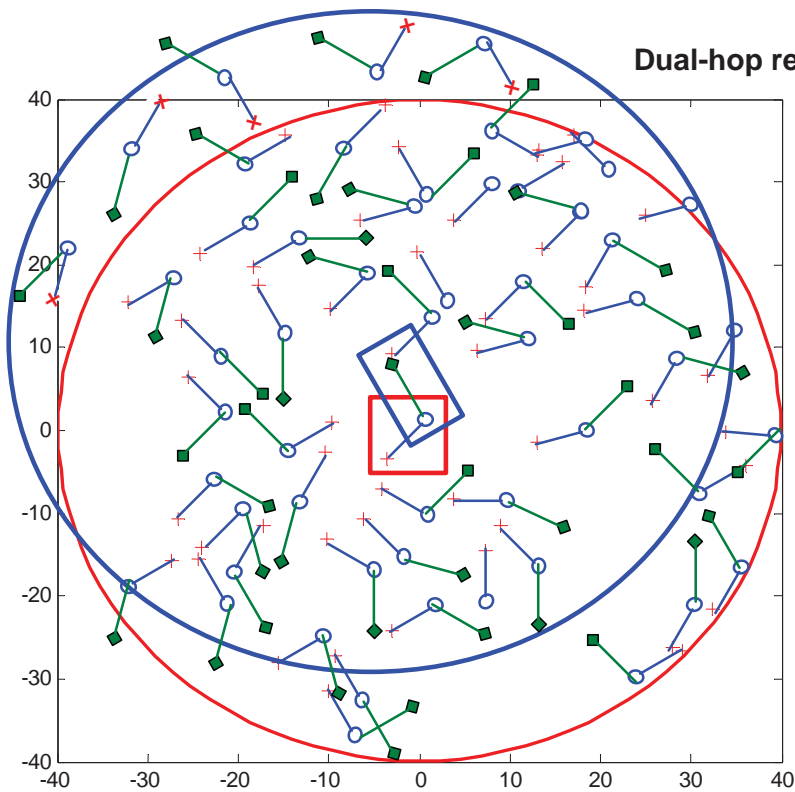

Supplement: MOESM1 [file 11898106]
